# Supplementary material for: New Insight on Medieval Painting in Sicily: The Virgin Hodegetria Panel in Monreale Cathedral (Palermo, Italy)
Source: MDPI journal article supplement (doi:10.3390/heritage6060249), 2023-06-06
Supplement: s1 [file s1]

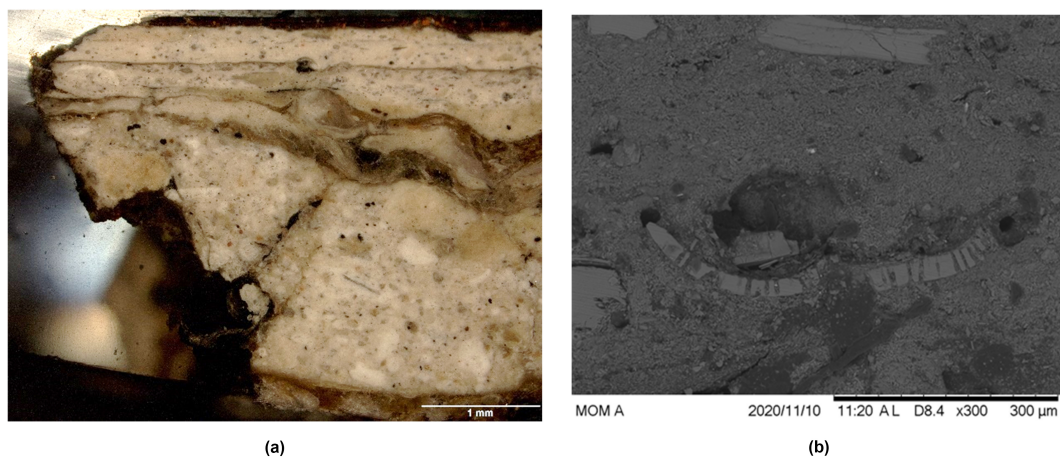

**Figure S1.** Sample MOM-A: (a) PLM micrograph of the ground layer in reflected light; (b) ESEM/BSE micrograph of the microfossil in the ground layer.

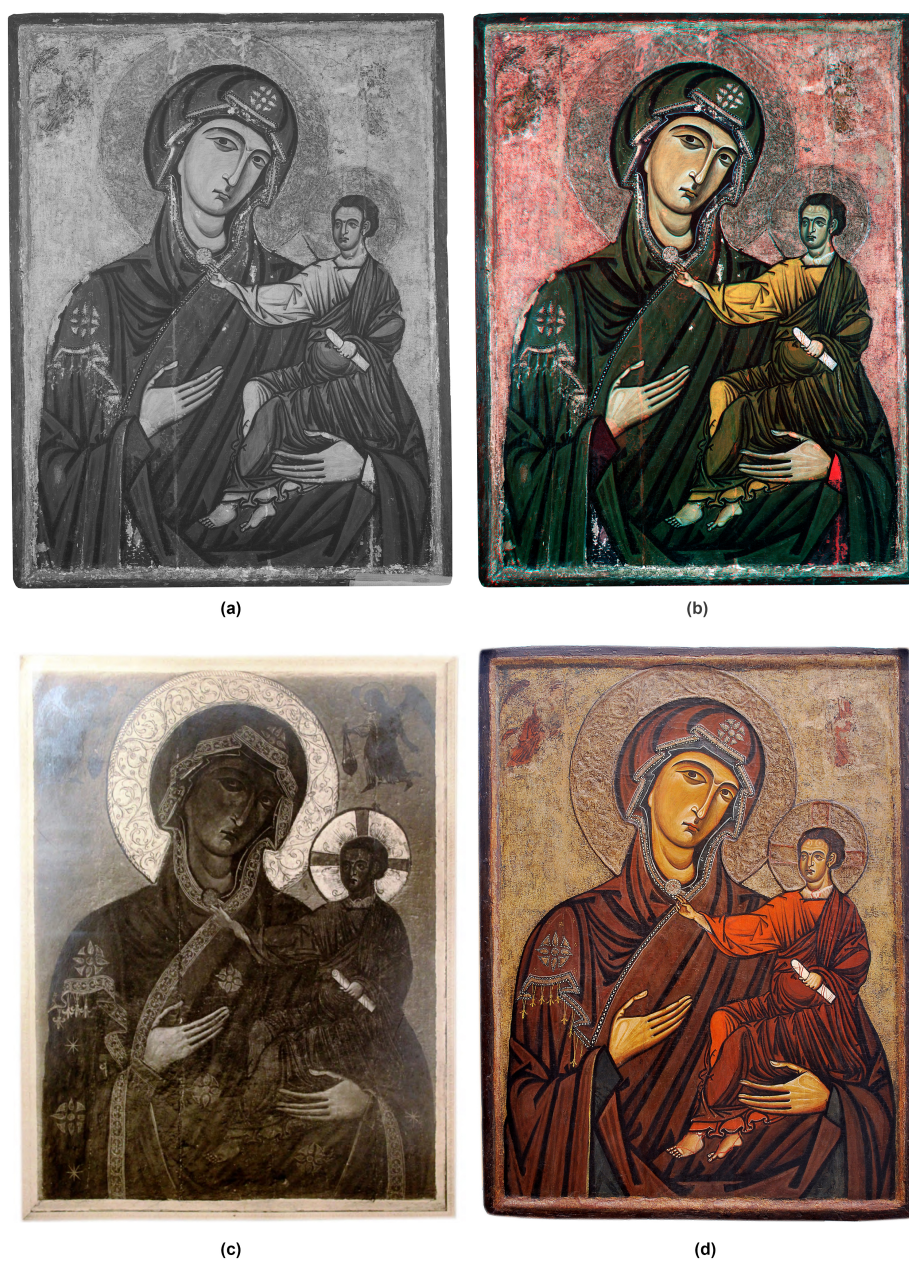

**Figure S2.** The “Virgin Hodegetria” panel painting: (a) IR reflectography; (b) IRFC image; (c) historical photo after the restoration carried out in the 19th century; (d) after the recent restoration intervention.

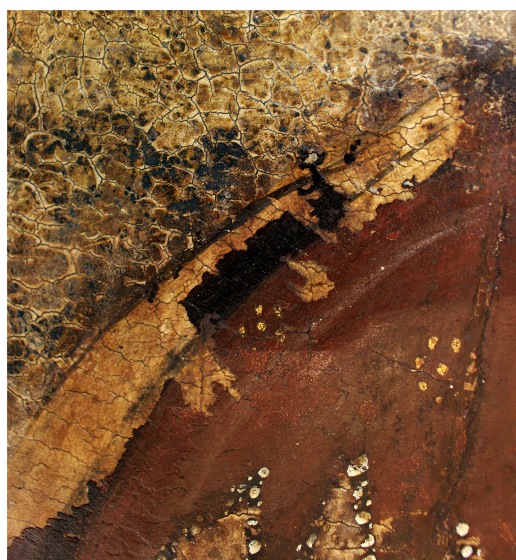

(a)

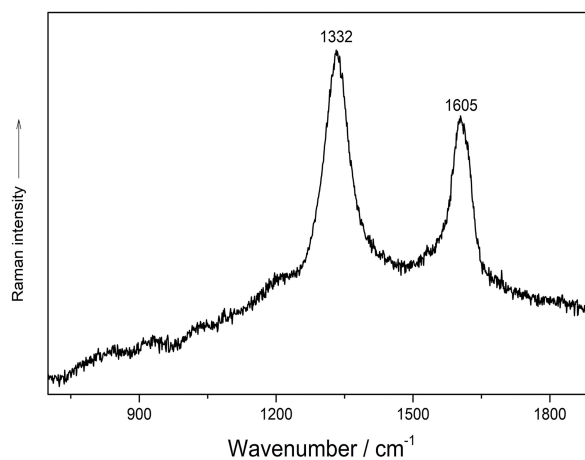

(b)

**Figure S3.** (a) Underdrawing traces in the lacuna of Virgin's shoulder; (b) sample MOM-G:  $\mu$ -Raman spectrum of carbon black.

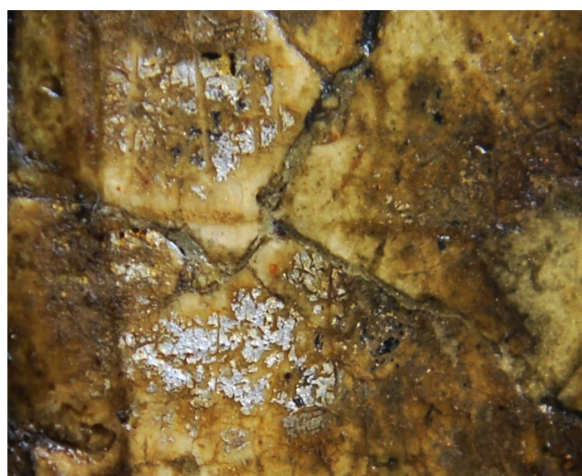

(a)

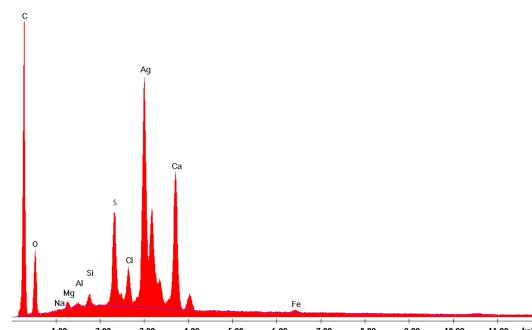

(b)

**Figure S4.** (a) Macro photograph of silver leaf traces on the background; (b) sample MOM-C: ESEM/EDX spectrum of original silver leaf.



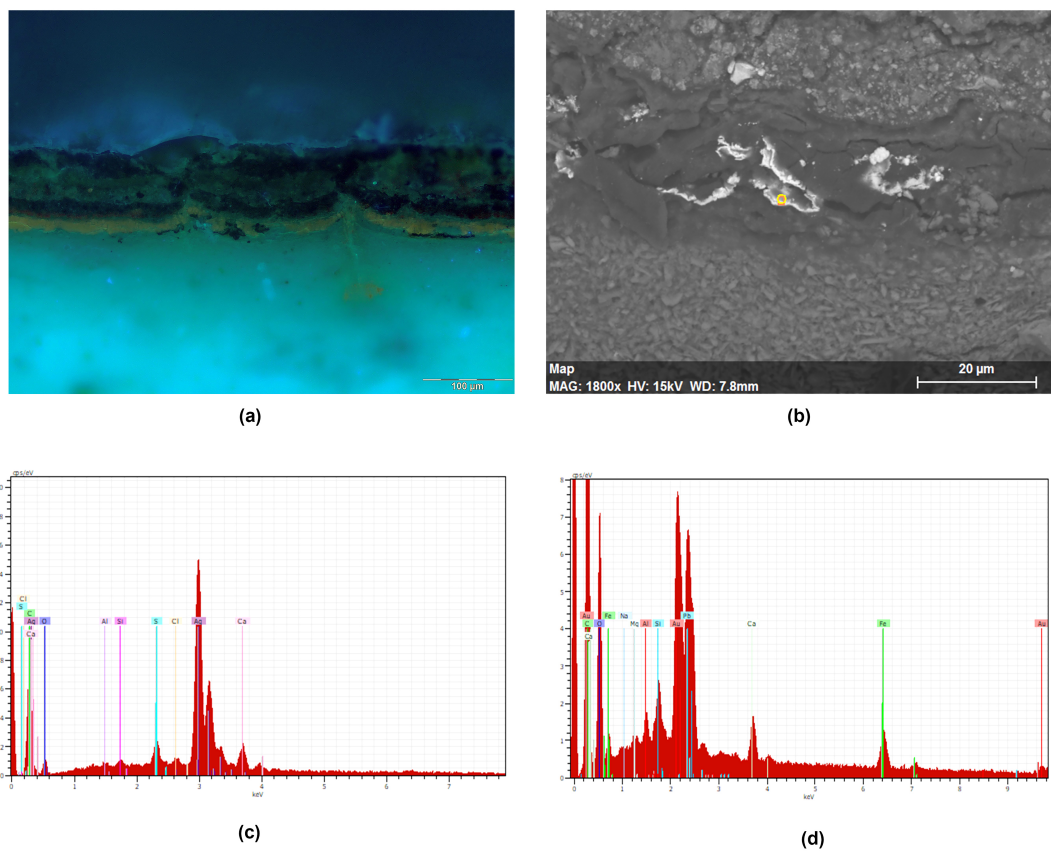

**Figure S5.** Sample MOM-B: (a) PLM micrograph, UV light; (b) ESEM/BSE micrograph: detail of the original Ag leaf on the ground layer; (c) EDX spectrum of Ag leaf; (d) EDX spectrum of Au leaf.

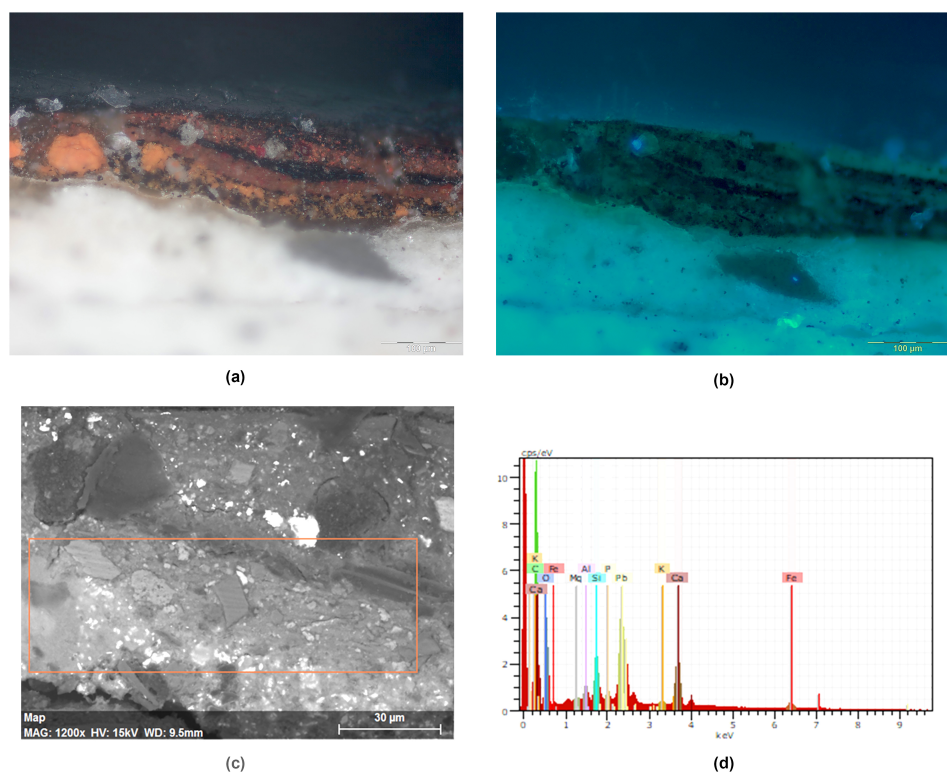

**Figure S6.** Sample MOM-A: (a) PLM micrograph, detail of painting layers; (b) PLM micrograph, UV light; (c) ESEM/EDX micrograph, microanalysis detail; (d) EDX spectrum of red lead-based layer.

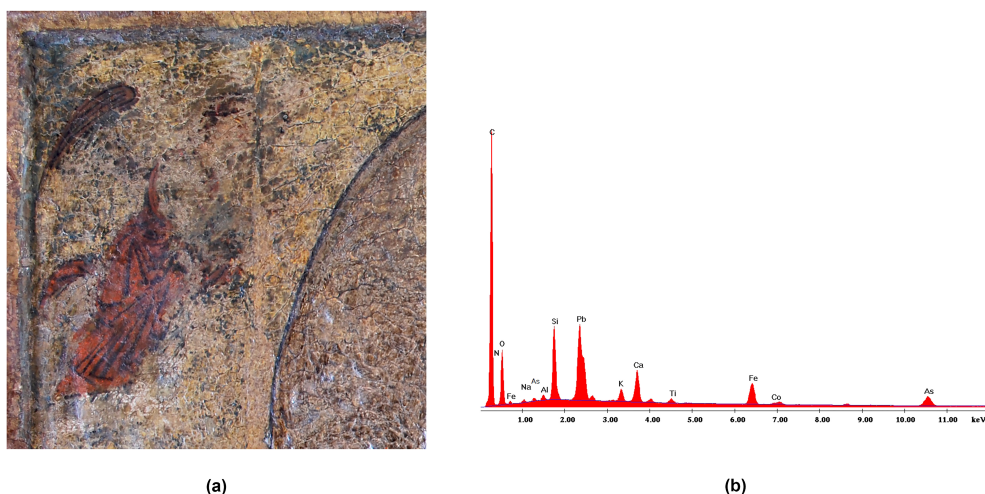

**Figure S7.** (a) Blue traces of repainting layer, upper left corner, detail; (b) sample MOM-D: ESEM/EDX spectrum of the repainting layer.

**Table S1.** ED-XRF analysis measurement point (ED-XRF/MP), description and elemental composition of the investigated areas

| <i>ED-XRF/PM</i> | <i>Description</i>                             | <i>ED-XRF detected elements</i>          |
|------------------|------------------------------------------------|------------------------------------------|
| MO 1             | Flesh tone, Virgin's left hand, shadow         | Pb, Ca, S, Fe, Hg, Sr, K, Mn, Si         |
| MO 2             | Flesh tone, Virgin's left hand midtone         | Pb, Ca, Fe, Sr, Mn, Si, Hg               |
| MO 3             | Flesh tone, Virgin's left hand, light          | Pb, S, Ca, Fe, Sr, Hg                    |
| MO 4             | Blue, Virgin's sleeve                          | Pb, Cu, S, Ca, Fe, K, Sr, Ba, Si         |
| MO 6             | Dark red, Virgin's mantle right sleeve, shadow | Ca, Pb, S, Hg, Fe, Sr, K, Ba, Si, P, Cu  |
| MO 7             | Dark red, Virgin's shoulder mantle fold        | Pb, S, Ca, Hg, Fe, Sr, K, Si, Ba         |
| MO 8             | Red, Child dress sleeve                        | Pb, S, Hg, Ca, As, Fe, Sr, Al, K         |
| MO 10            | Flesh tone, Virgin's cheek, shadow             | Ca, Pb, S, Sr, Fe, K, Si, P              |
| MO 11            | Flesh tone, Virgin's cheekbone, light          | Ca, Pb, S, Sr, Fe, K, Si                 |
| MO 12            | Red contour line, Virgin's face                | Pb, S, Ca, Sr, Fe, Hg                    |
| MO 13            | Black, Virgin's left eyebrow, shadow           | Pb, Ca, S, Hg, Fe, Sr, K, Cu, Mn         |
| MO 14            | Reddish, Virgin's left eyebrow, midtone        | Ca, Pb, S, Hg, Fe, Sr, K, Si, P          |
| MO 15            | Red, Virgin's left eyebrow                     | Ca, Pb, S, Hg, Fe, Sr, K, Si             |
| MO 16            | Red, Virgin's upper lip, shadow                | Pb, Ca, S, Hg, Fe, Sr, K, Si, Al, P      |
| MO 17            | Light blue, Virgin's veil                      | Pb, S, Cu, Ca, Sr, Fe                    |
| MO 18            | Red, Child halo, dark outline                  | Ca, S, Pb, Hg, Sr, Ag, Fe, K, Cu, Au     |
| MO 19            | Gilding, Child halo                            | Ca, S, Pb, Sr, Cu, Fe, Ag, Mn, K, Au, Hg |
| MO 20            | Gilding, Virgin's halo, right side             | Ca, S, Sr, Fe, Pb, Au                    |
| MO 21            | Gilding, background on Virgin's right side     | Ca, S, Pb, K, Sr, Fe, Si, Cu, Ag         |
| MO 22            | Gilding, background on Virgin's right side     | Ca, S, Pb, Cl, Ag, K, Cu, Fe             |
| MO 23            | Gilding, background on angel base, left        | Ca, S, Sr, Pb, K, Fe, Si, Ag             |
| MO 24            | Ground layer, lacuna on Virgin's right eyebrow | Ca, S, Sr, Pb, Fe                        |
